# Supplementary material for: Epigenetic domains found in mouse embryonic stem cells via a hidden Markov model
Source: Springer Nature journal article supplement (doi:10.1186/1471-2105-11-557), 2010-11-12

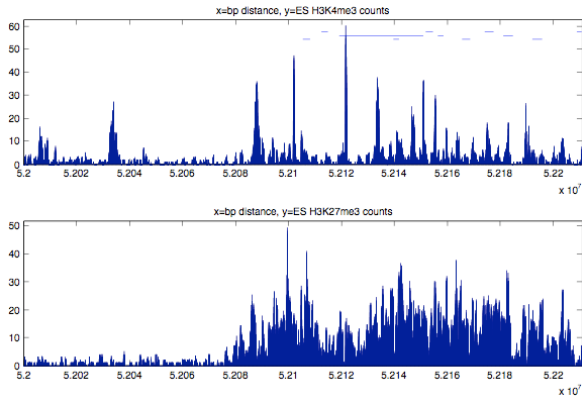

Raw ChIP-seq data

Step 1: Generate a 5-d score for each gene

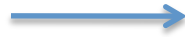

|          | Gene A | Gene B | Gene C | ... |
|----------|--------|--------|--------|-----|
| H3K4me2  | 1.4608 | 2.148  | 3.6203 | ... |
| H3K4me3  | 7.4275 | 12.786 | 11.797 | ... |
| H3K27me3 | 0.1529 | 0.2705 | 4.9406 | ... |
| H3K9me3  | 0.2323 | 0.2529 | 0.5062 | ... |
| H3K36me3 | 0.05   | 4.0833 | 1.5883 | ... |

Score matrix of pre-processed ChIP-seq data

Step 2: Cluster the genes to obtain prior modification specific means and variances

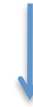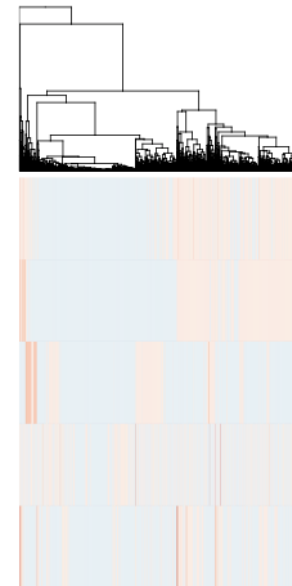

Heatmap cluster of score matrix data

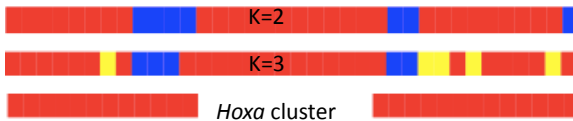

Examine biological validity of domains

Step 4: Find significant domains via permutation tests

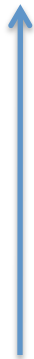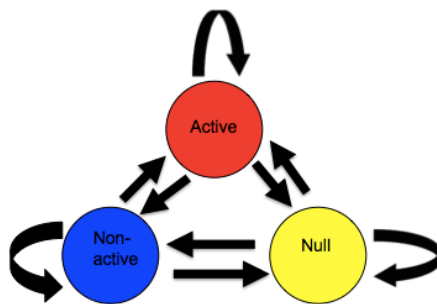

HMM true hidden states and possible transitions

Step 3: Assume a hidden Markov model where the observed scores are multivariate normal with prior parameters taken from cluster results

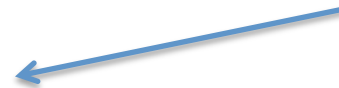

Supplement: 12859_2010_4140_MOESM14_ESM.pdf [file 12859_2010_4140_MOESM14_ESM.pdf]
