# Supplementary material for: Epigenetic domains found in mouse embryonic stem cells via a hidden Markov model
Source: Springer Nature journal article supplement (doi:10.1186/1471-2105-11-557), 2010-11-12

a)

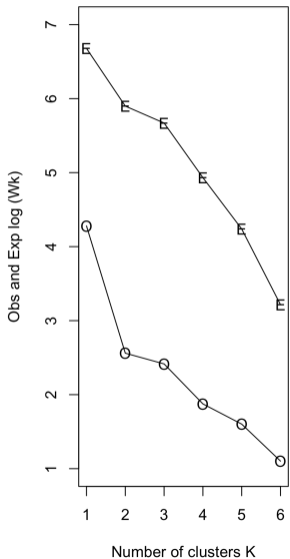

b)

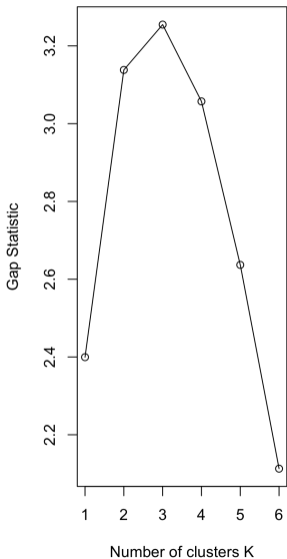

Supplement: 12859_2010_4140_MOESM15_ESM.pdf [file 12859_2010_4140_MOESM15_ESM.pdf]
