# Supplementary material for: Epigenetic domains found in mouse embryonic stem cells via a hidden Markov model
Source: Springer Nature journal article supplement (doi:10.1186/1471-2105-11-557), 2010-11-12
Supplement: 12859_2010_4140_MOESM17_ESM.pdf [file 12859_2010_4140_MOESM17_ESM.pdf]

**Within domain variance H3K4me2**

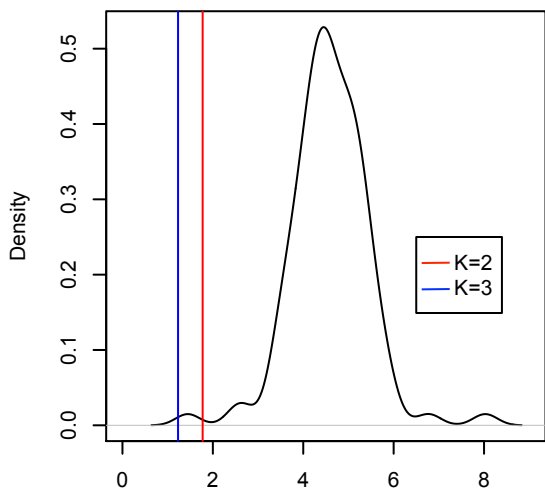

p-value = 0.003  
p-value = 0.001

**Within domain variance H3K4me3**

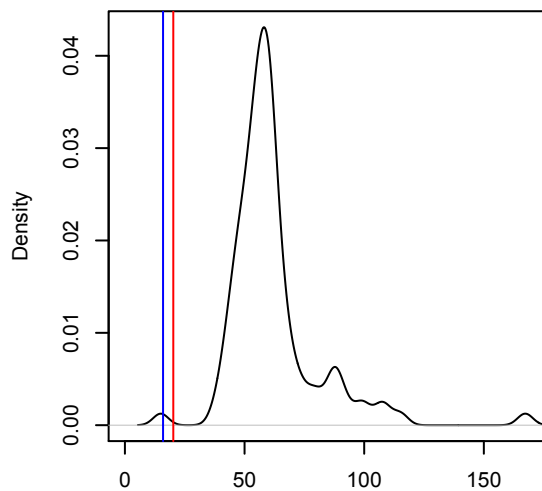

p-value = 0.002  
p-value = 0.001

**Within domain variance H3K27me3**

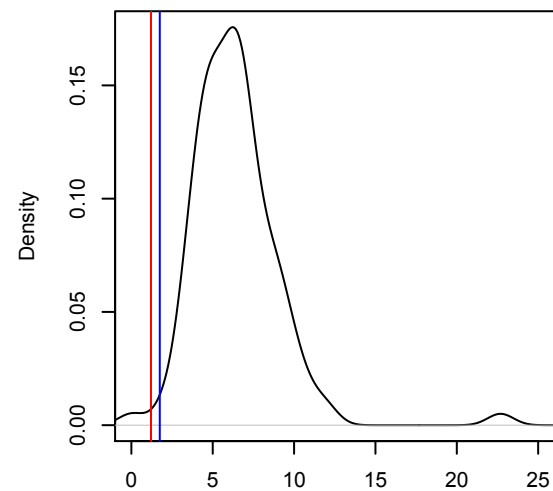

p-value = 0.001  
p-value = 0.001

**Within domain variance H3K9me3**

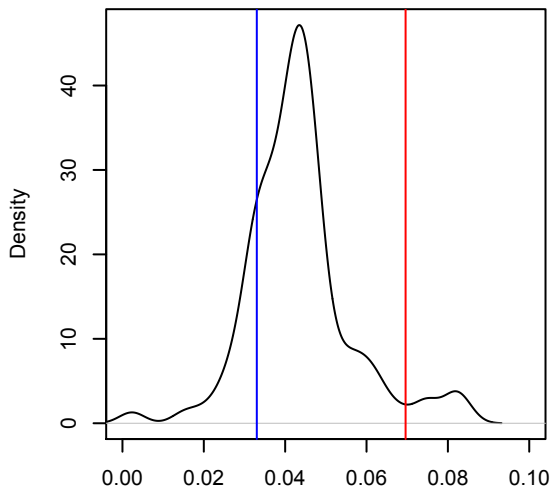

p-value = 0.972  
p-value = 0.093

**Within domain variance H3K36me3**

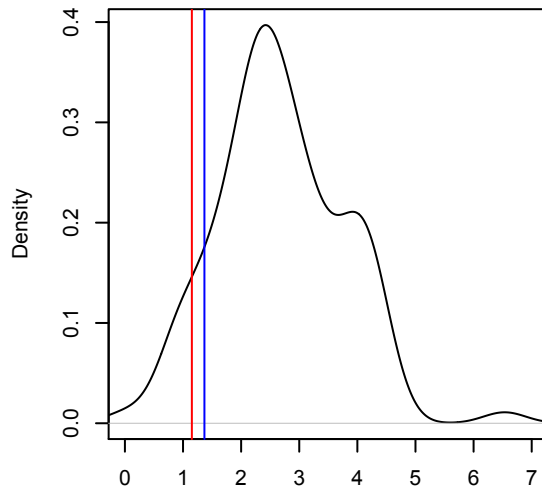

p-value = 0.013  
p-value = 0.015
