# Supplementary material for: Epigenetic domains found in mouse embryonic stem cells via a hidden Markov model
Source: Springer Nature journal article supplement (doi:10.1186/1471-2105-11-557), 2010-11-12
Supplement: 12859_2010_4140_MOESM18_ESM.pdf [file 12859_2010_4140_MOESM18_ESM.pdf]

**Within domain variance ES cell line**

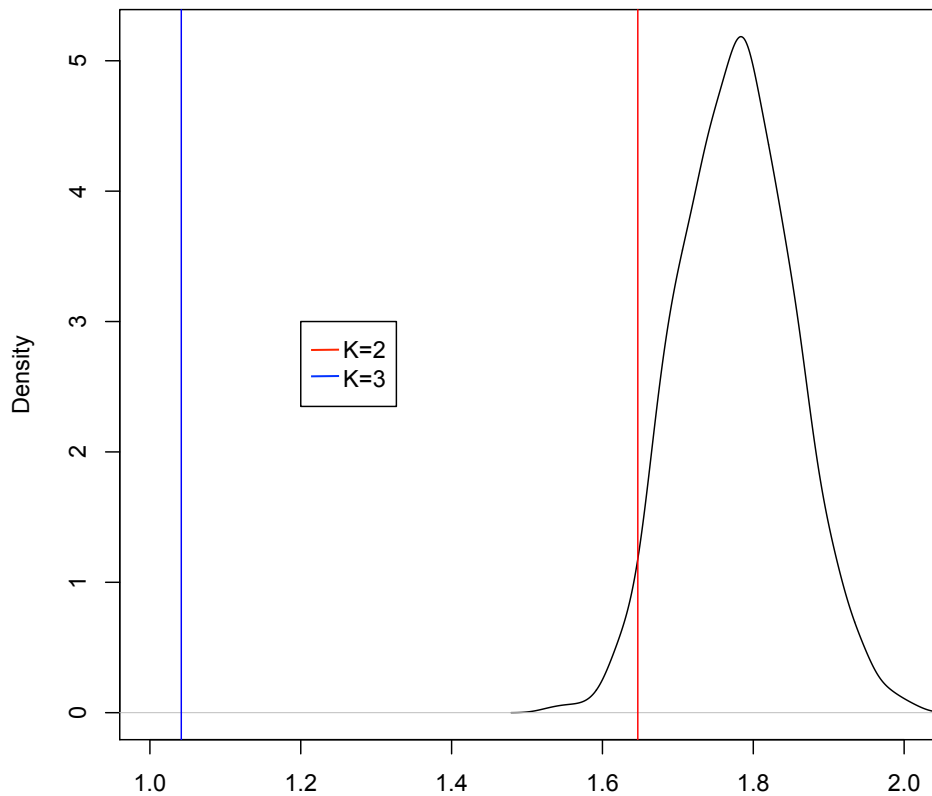

**p-value = 0.030**

**p-value < 0.001**

**Average Fleiss' Kappa**

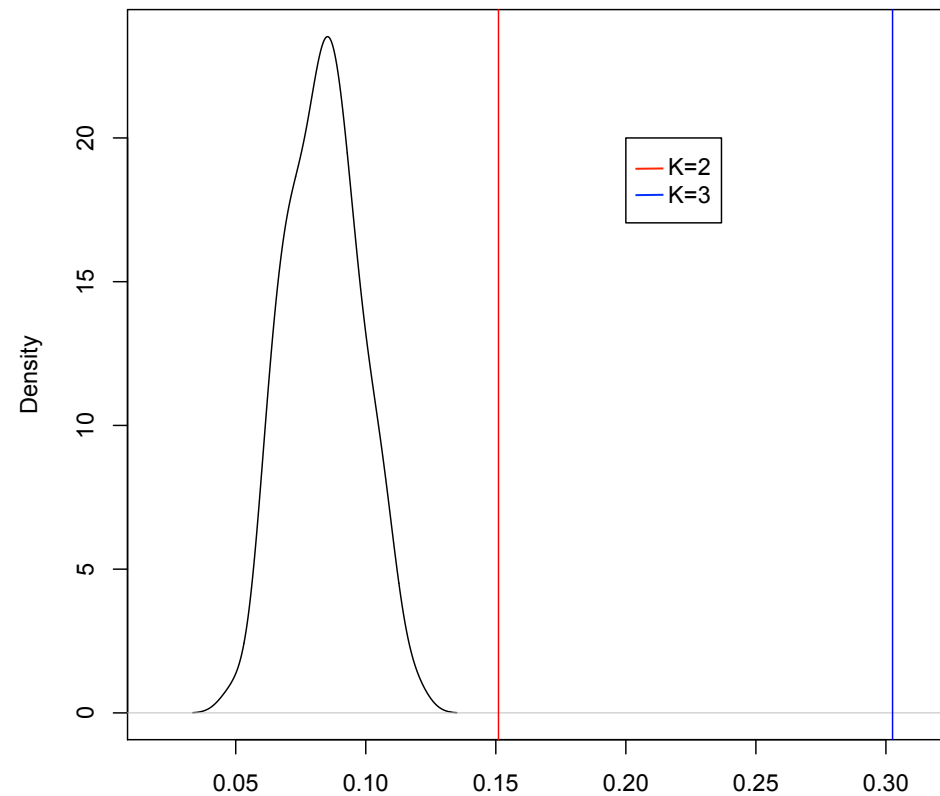

**p-value < 0.001**

**p-value < 0.001**
