# Supplementary material for: Epigenetic domains found in mouse embryonic stem cells via a hidden Markov model
Source: Springer Nature journal article supplement (doi:10.1186/1471-2105-11-557), 2010-11-12

**ES Active and NP Active**

65 domains, 529 genes

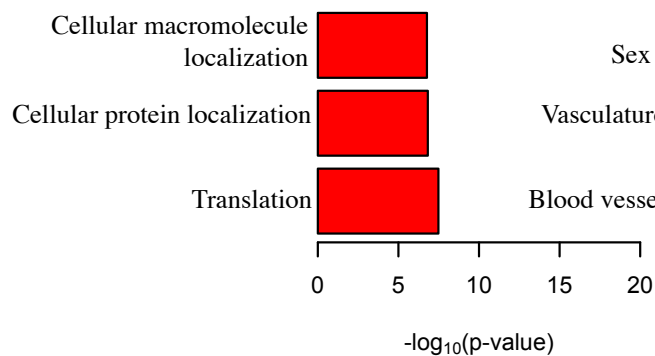**ES Active and NP Non-active**

9 domains, 75 genes

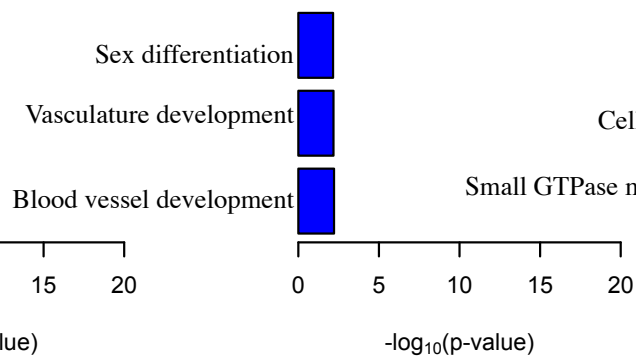**ES Active and NP Null**

5 domains, 57 genes

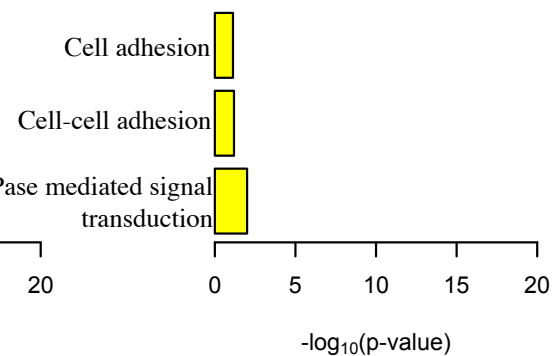**ES Non-active and NP Active**

8 domains, 66 genes

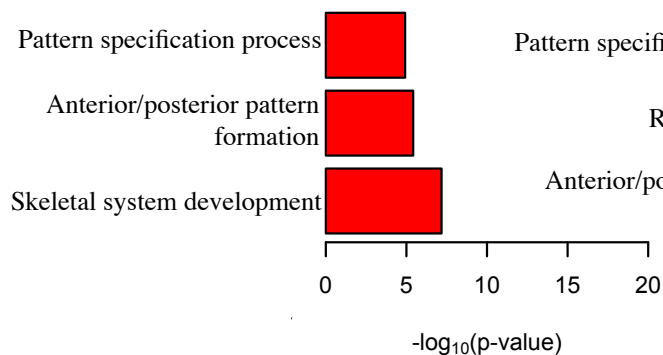**ES Non-active and NP Non-active**

6 domains, 92 genes

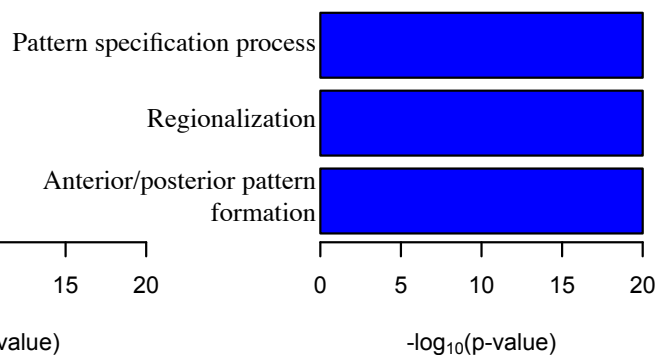**ES Non-active and NP Null**

12 domains, 129 genes

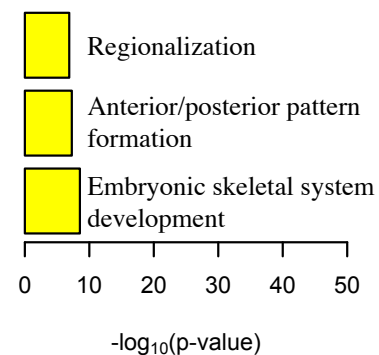**ES Null and NP Active**

6 domains, 108 genes

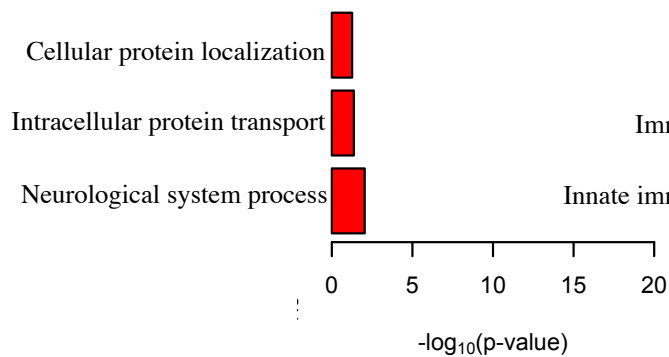**ES Null and NP Non-active**

4 domains, 75 genes

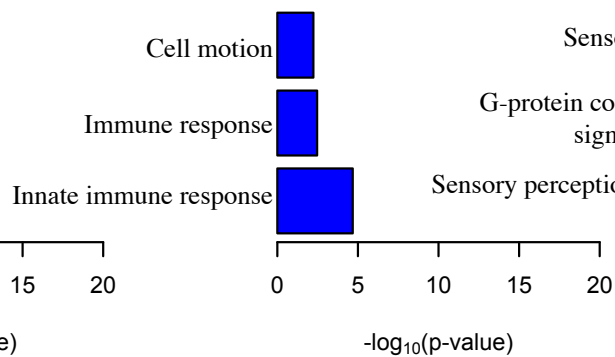**ES Null and NP Null**

144 domains, 1847 genes

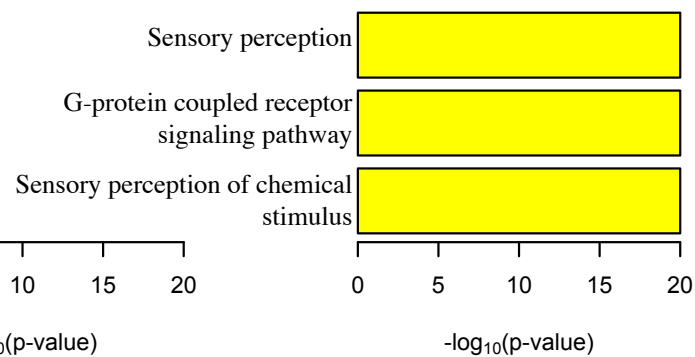

Supplement: 12859_2010_4140_MOESM22_ESM.pdf [file 12859_2010_4140_MOESM22_ESM.pdf]
